# Supplementary material for: Soybean (Glycine max) INFOGEST Colonic Digests Attenuated Inflammatory Responses Based on Protein Profiles of Different Varieties
Source: MDPI journal article supplement (doi:10.3390/ijms241512396), 2023-08-03
Supplement: s1 [file s1]

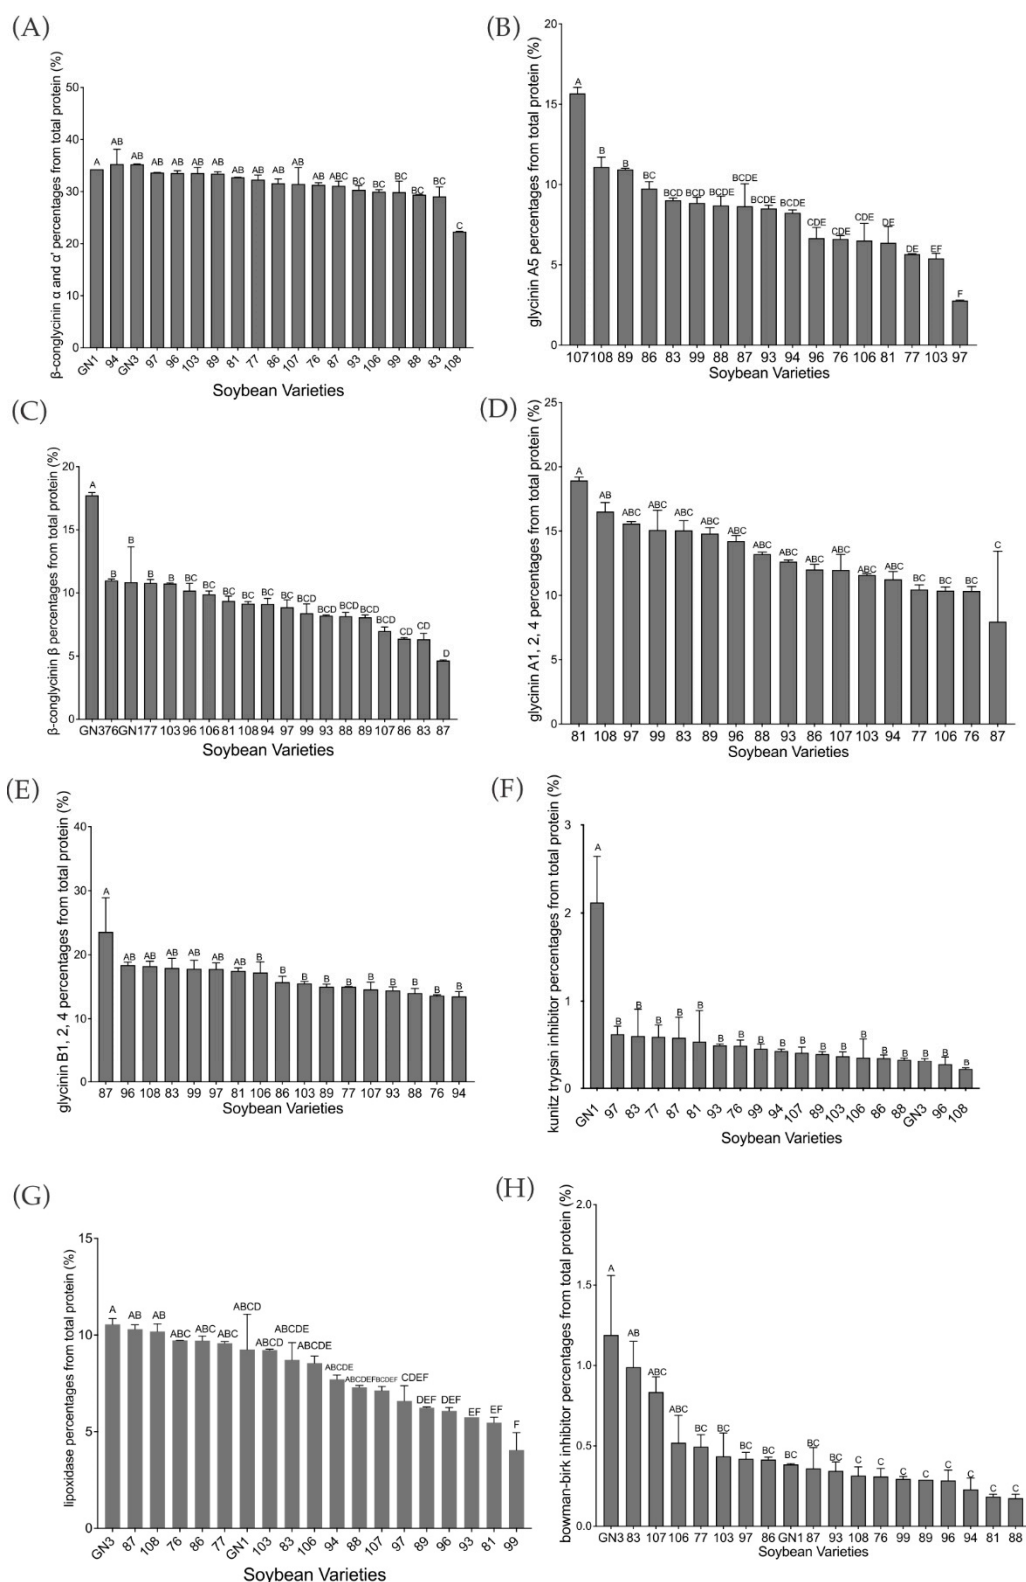

**Supplemental Figure S1.** The proportion of each protein content expressed as a percentage of total protein content (A) β-conglycinin subunits α and α' (B) Glycinin A5 (C) β-conglycinin β (D) Glycinin A1, 2, 4 (E) Glycinin B1, 2, 4 (F) Kunitz Trypsin Inhibitor (G) LOX (H) Bowman-Birk Inhibitor. Results are arranged from highest to lowest. Bars with different letters represent statistically significant differences according to one-way ANOVA and Tukey's multiple comparison tests ( $p < 0.05$ ).

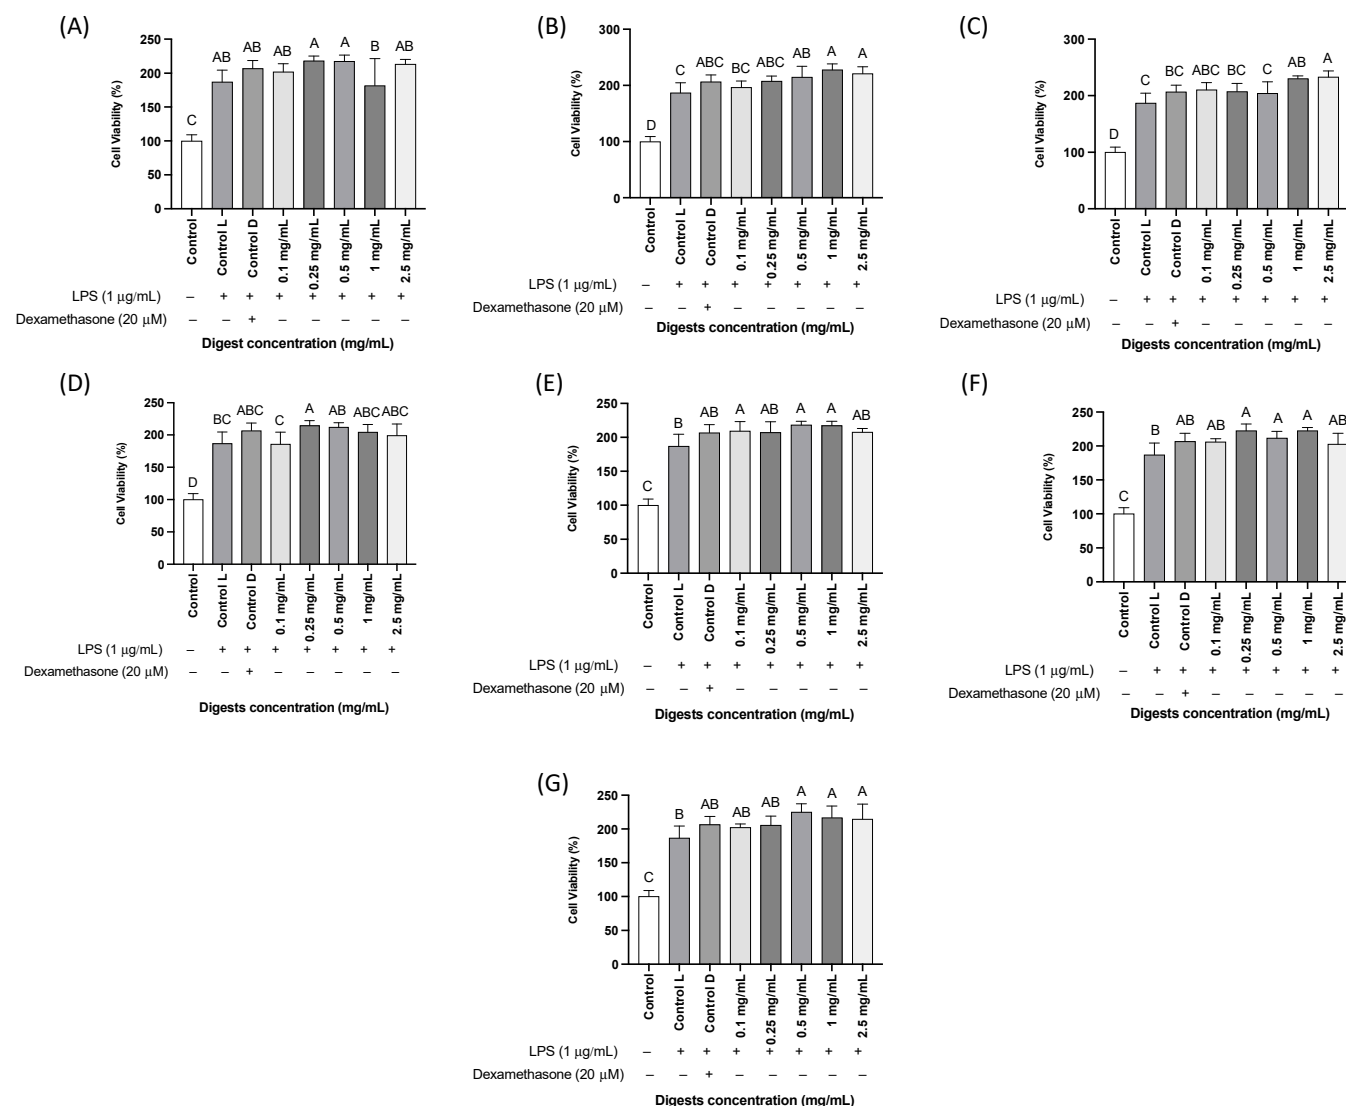

**Supplemental Figure S2.** Cell viability of different digests concentrations for the varieties (A) 81, (B) 87, (C) 96, (D) 103, (E) 108, (F) GN1 and (G) GN3. NS = no significance  $p > 0.05$ . The assay was done at least in duplicates. Data were analyzed using ANOVA (one-way) and Tukey's post hoc test. Bars with different letters represent statistically significant differences ( $p < 0.05$ )

**Supplementary Table S1.** Identification of proteins in soybean varieties and their respective approximate molecular weight ranges.

| Protein                        | Molecular Weight (kDa)    |
|--------------------------------|---------------------------|
| Lipoxygenase                   | 90 – 95                   |
| $\beta$ -conglycinin $\alpha'$ | 57 – 72                   |
| $\beta$ -conglycinin $\alpha$  | 57 – 68                   |
| $\beta$ -amylase               | 61.5 – 63                 |
| $\beta$ -conglycinin $\beta$   | 45 – 52                   |
| Glycinin acidic subunit        | 10 – 15, 30 – 38, 42 – 44 |
| Kunitz trypsin inhibitor (KTI) | 21.5 – 22.5               |
| Glycinin basic subunit         | 18 – 20                   |
| Bowman-Birk inhibitor (BBI)    | 8 – 10                    |
